# Supplementary material for: Transcriptome profiling of monocytes from XLA patients revealed the innate immune function dysregulation due to the BTK gene expression deficiency
Source: PubMed Central journal article supplement (PMC5533715; doi:10.1038/s41598-017-06342-5), 2017-07-28

## Supplementary Figure S1

**Transcriptome profiling of monocytes from XLA patients revealed the innate immune function dysregulation due to the BTK gene expression deficiency.**

Hoda Mirsafian, Adiratna Mat Ripen, Wai-Mun Leong, Chai Teng Chear, Saharuddin Bin Mohamad, Amir Feisal Merican.

\* Corresponding author:

Amir Feisal Merican

Institute of Biological Sciences, Faculty of Science, University of Malaya, 50603 Kuala Lumpur, Malaysia.

Email: [merican@um.edu.my](mailto:merican@um.edu.my), [mericanmy@gmail.com](mailto:mericanmy@gmail.com)

Telephone: +60379674189

**a**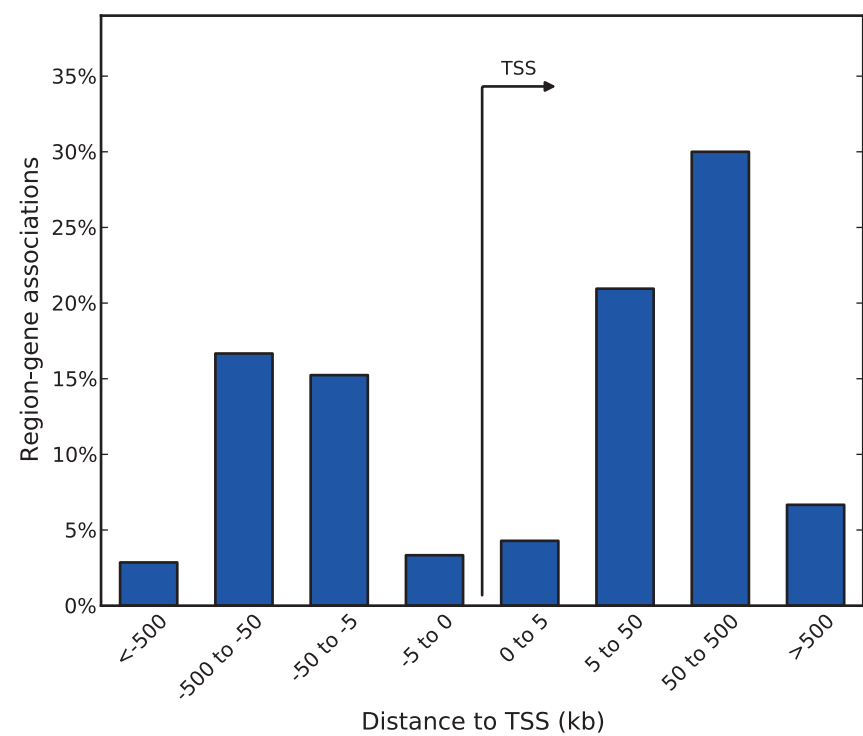**b**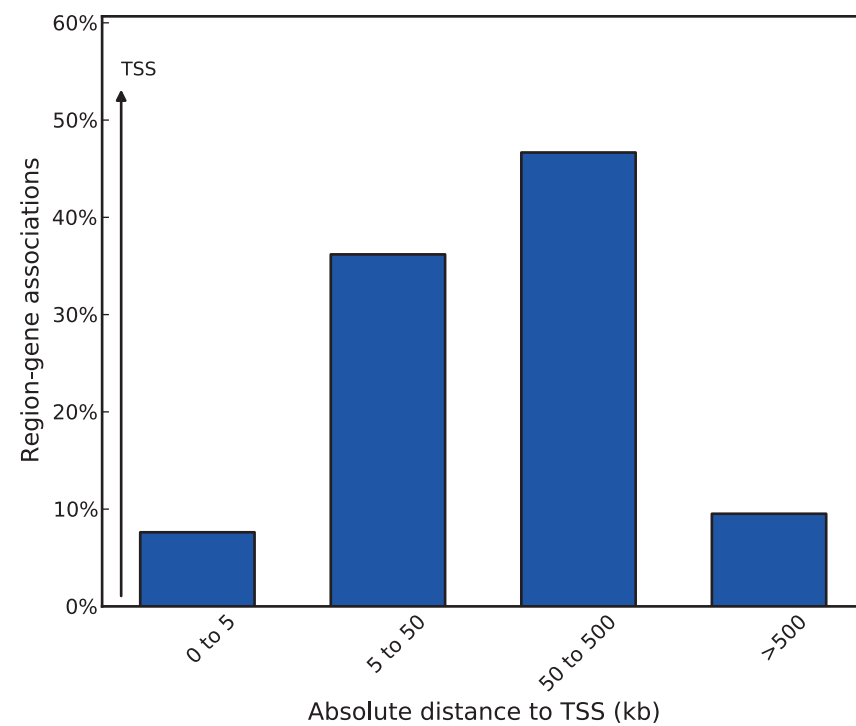

Supplement: 41598_2017_6342_MOESM1_ESM.pdf [file 41598_2017_6342_MOESM1_ESM.pdf]
